# Supplementary material for: Identification of toxic mold species through Raman spectroscopy of fungal conidia
Source: PLoS One. 2020 Nov 23;15(11):e0242361. doi: 10.1371/journal.pone.0242361 (PMC7682877; doi:10.1371/journal.pone.0242361)
Supplement: S1 Dataset — (XLSX) [file pone.0242361.s003.xlsx]

## Sheet: Sheet1
Raman Shift	Raw spectrum	Raman spectrum
264.297	0.0175802	0.00246712
267.646	0.021877	0.00217968
270.992	0.036354	0.00240744
274.337	0.037587	0.00273455
277.68	0.0401297	0.0032184
281.02	0.039682	0.00538668
284.359	0.0401535	0.00890955
287.697	0.0723466	0.0132526
291.033	0.103317	0.0200124
294.366	0.129318	0.0299094
297.698	0.164386	0.043716
301.028	0.19984	0.0627748
304.357	0.264482	0.087605
307.684	0.30884	0.118171
311.008	0.384372	0.153692
314.331	0.455457	0.193278
317.652	0.504996	0.235893
320.971	0.555099	0.27927
324.289	0.621762	0.320678
327.604	0.655619	0.357522
330.919	0.683331	0.387583
334.232	0.708078	0.408758
337.541	0.723521	0.420624
340.851	0.7412	0.423847
344.157	0.756851	0.419236
347.463	0.771122	0.407748
350.766	0.758326	0.390472
354.068	0.75648	0.368389
357.367	0.742584	0.342982
360.666	0.739374	0.316154
363.961	0.732854	0.289334
367.256	0.705232	0.262683
370.549	0.667034	0.236671
373.84	0.642133	0.212774
377.129	0.604152	0.191899
380.416	0.571319	0.174507
383.703	0.544269	0.162098
386.986	0.522973	0.155245
390.268	0.50758	0.152897
393.549	0.511665	0.154779
396.828	0.516302	0.161081
400.104	0.539252	0.171061
403.379	0.546479	0.18263
406.653	0.578509	0.194941
409.925	0.612099	0.207206
413.194	0.624178	0.216929
416.462	0.597736	0.223548
419.73	0.627964	0.227782
422.994	0.623252	0.228966
426.257	0.621288	0.226326
429.518	0.612258	0.220954
432.777	0.590652	0.214402
436.035	0.579787	0.207001
439.291	0.585608	0.199207
442.546	0.576761	0.19058
445.798	0.583575	0.180575
449.049	0.587431	0.169933
452.298	0.580312	0.158957
455.545	0.570782	0.148435
458.791	0.565123	0.137698
462.035	0.550317	0.126728
465.277	0.545579	0.11684
468.518	0.551557	0.10805
471.756	0.537756	0.101244
474.993	0.505538	0.098074
478.228	0.481968	0.100334
481.461	0.454523	0.109256
484.693	0.44545	0.125957
487.924	0.449613	0.150169
491.152	0.473251	0.179254
494.379	0.499766	0.208518
497.604	0.551967	0.234073
500.826	0.603727	0.253978
504.048	0.640001	0.265279
507.268	0.625727	0.265035
510.487	0.589374	0.25375
513.703	0.574651	0.23351
516.917	0.552491	0.206979
520.131	0.518899	0.178672
523.342	0.503398	0.152143
526.551	0.488159	0.128582
529.759	0.462543	0.109301
532.966	0.455174	0.0947636
536.17	0.434004	0.0835469
539.373	0.389375	0.0746094
542.574	0.367149	0.0676062
545.773	0.352345	0.062943
548.971	0.34488	0.0590091
552.167	0.325198	0.0560817
555.362	0.312789	0.0550031
558.554	0.310374	0.054115
561.745	0.294336	0.0536216
564.934	0.295131	0.0530462
568.122	0.300961	0.0523941
571.308	0.323036	0.052333
574.493	0.327701	0.0515542
577.675	0.318261	0.0509002
580.856	0.323604	0.0508086
584.035	0.339466	0.049996
587.212	0.314816	0.0488762
590.389	0.32407	0.0477204
593.563	0.297982	0.046011
596.735	0.260692	0.0437349
599.906	0.256305	0.0414556
603.075	0.241601	0.0393103
606.243	0.22666	0.0368653
609.409	0.195008	0.0343501
612.573	0.159165	0.0325564
615.735	0.129852	0.0311767
618.896	0.100733	0.0293891
622.056	0.101857	0.0274363
625.213	0.0954783	0.025445
628.369	0.0817381	0.0234318
631.523	0.0863946	0.0213025
634.676	0.0754828	0.0190163
637.826	0.0727518	0.0167431
640.977	0.0830559	0.0152204
644.124	0.0990305	0.0145942
647.27	0.135771	0.0147928
650.414	0.130816	0.0159837
653.557	0.150427	0.0174335
656.698	0.164097	0.0187627
659.837	0.157994	0.0205216
662.975	0.172556	0.0218723
666.111	0.166478	0.0228686
669.246	0.164559	0.0240678
672.378	0.162549	0.0251914
675.51	0.142818	0.0263535
678.639	0.148518	0.0270797
681.767	0.134657	0.0273367
684.893	0.121224	0.0272825
688.018	0.116345	0.027423
691.141	0.109635	0.0284839
694.262	0.111559	0.0303222
697.382	0.110984	0.0323719
700.5	0.118583	0.0348214
703.616	0.160459	0.0375268
706.731	0.140153	0.0402532
709.845	0.145006	0.0428189
712.957	0.166135	0.0455009
716.067	0.159384	0.0480866
719.175	0.161727	0.0501856
722.282	0.1651	0.0519299
725.387	0.167764	0.053187
728.49	0.173811	0.0550606
731.592	0.162369	0.0582047
734.693	0.183949	0.061473
737.791	0.146325	0.0656055
740.888	0.147611	0.0713326
743.983	0.129994	0.0783425
747.077	0.123568	0.0855644
750.169	0.121064	0.0910532
753.26	0.111545	0.0958067
756.349	0.144819	0.0996416
759.437	0.150694	0.102129
762.522	0.132158	0.102825
765.607	0.128368	0.10057
768.689	0.131794	0.0964679
771.77	0.141131	0.0909663
774.849	0.160114	0.0846972
777.928	0.155363	0.0785204
781.004	0.15842	0.0730745
784.078	0.170228	0.0678304
787.152	0.161274	0.0627766
790.223	0.158182	0.0582904
793.292	0.180055	0.0545727
796.361	0.148459	0.0521977
799.428	0.160013	0.0508243
802.492	0.136762	0.0503417
805.556	0.136587	0.0511076
808.618	0.122586	0.05352
811.678	0.132388	0.056647
814.737	0.110524	0.0598379
817.794	0.120473	0.0635482
820.849	0.121062	0.0682603
823.904	0.116668	0.0741665
826.956	0.103398	0.0810175
830.007	0.129626	0.0888067
833.056	0.138006	0.0971328
836.104	0.151227	0.105456
839.15	0.179056	0.113239
842.195	0.191466	0.119461
845.237	0.215961	0.123042
848.279	0.236221	0.124919
851.319	0.259181	0.125854
854.357	0.2515	0.12459
857.394	0.238229	0.120444
860.429	0.239471	0.114393
863.463	0.242265	0.107816
866.495	0.237337	0.100451
869.525	0.233022	0.0917205
872.554	0.210561	0.0835362
875.582	0.196782	0.0765724
878.607	0.162194	0.0695912
881.631	0.137086	0.063562
884.654	0.124189	0.0591911
887.675	0.0871681	0.0560751
890.695	0.0539195	0.0532532
893.712	0.0509535	0.0506176
896.729	0.0511958	0.049457
899.744	0.0420028	0.0501637
902.758	0.0454249	0.051801
905.769	0.0381061	0.0537406
908.779	0.0469862	0.0570651
911.788	0.0612225	0.0613321
914.795	0.0840731	0.0662733
917.801	0.0824341	0.0714302
920.805	0.109451	0.0761363
923.808	0.120986	0.0803576
926.809	0.129581	0.0838187
929.808	0.140453	0.0863589
932.806	0.167646	0.0880713
935.802	0.150922	0.0902269
938.798	0.173794	0.0926901
941.791	0.17006	0.0960349
944.783	0.192483	0.101186
947.773	0.187922	0.107384
950.762	0.175224	0.114836
953.749	0.185454	0.123252
956.735	0.180162	0.131134
959.719	0.176245	0.138435
962.701	0.171334	0.144929
965.683	0.15018	0.14972
968.662	0.145915	0.153655
971.64	0.137356	0.157049
974.617	0.112006	0.159641
977.592	0.123782	0.162872
980.565	0.126748	0.166761
983.537	0.114761	0.170829
986.508	0.120197	0.174158
989.477	0.16332	0.175395
992.444	0.173435	0.174496
995.41	0.169824	0.171085
998.374	0.179928	0.164471
1001.34	0.188184	0.154834
1004.3	0.17615	0.143207
1007.26	0.179051	0.129676
1010.22	0.168582	0.115249
1013.17	0.168904	0.101745
1016.12	0.165933	0.0899939
1019.08	0.156596	0.0806382
1022.03	0.15587	0.0739812
1024.98	0.137434	0.0697636
1027.93	0.116982	0.0669193
1030.88	0.111722	0.0642206
1033.83	0.116701	0.0616315
1036.77	0.112313	0.0592461
1039.71	0.0900037	0.0563757
1042.66	0.0843446	0.0528083
1045.6	0.0648302	0.0488001
1048.54	0.0512719	0.0444462
1051.47	0.0500823	0.0397062
1054.41	0.0398433	0.0340599
1057.34	0.0286162	0.0280841
1060.28	0.0248677	0.0232878
1063.21	0.0361335	0.0201283
1066.14	0.0442306	0.0178235
1069.07	0.0552969	0.0162309
1071.99	0.0647945	0.0148004
1074.92	0.0822175	0.0131125
1077.84	0.0841132	0.0118665
1080.77	0.0958804	0.0105845
1083.69	0.104158	0.00898068
1086.61	0.122912	0.00830236
1089.52	0.14347	0.00841566
1092.44	0.151354	0.00861599
1095.36	0.147449	0.0102032
1098.27	0.174639	0.0131777
1101.18	0.160481	0.0172346
1104.09	0.172302	0.0229302
1107	0.161335	0.029569
1109.91	0.170852	0.037251
1112.82	0.163718	0.0452467
1115.72	0.164123	0.052196
1118.63	0.161504	0.0587785
1121.53	0.151843	0.0646583
1124.43	0.156572	0.0692286
1127.33	0.140328	0.0721606
1130.23	0.132147	0.0737168
1133.12	0.14063	0.0747255
1136.02	0.131572	0.0748916
1138.91	0.124289	0.0743634
1141.8	0.121559	0.0737754
1144.69	0.118702	0.0733394
1147.58	0.143554	0.0728699
1150.47	0.157108	0.0732048
1153.35	0.158683	0.0744683
1156.24	0.173887	0.0758523
1159.12	0.193222	0.0784296
1162	0.205776	0.082732
1164.88	0.199254	0.0887166
1167.76	0.208604	0.0982583
1170.64	0.213191	0.112462
1173.51	0.226163	0.130651
1176.39	0.241734	0.152273
1179.26	0.264523	0.176353
1182.13	0.2994	0.202445
1185	0.307072	0.229426
1187.87	0.320673	0.255368
1190.74	0.346328	0.279043
1193.61	0.349642	0.299639
1196.47	0.359152	0.315845
1199.33	0.344487	0.325653
1202.19	0.355043	0.329093
1205.05	0.339862	0.327009
1207.91	0.327626	0.318728
1210.77	0.30355	0.304737
1213.63	0.305981	0.285622
1216.48	0.286476	0.262554
1219.33	0.261702	0.237891
1222.18	0.23262	0.211934
1225.03	0.216118	0.184963
1227.88	0.189783	0.15982
1230.73	0.180901	0.138281
1233.58	0.174959	0.120332
1236.42	0.161401	0.107116
1239.26	0.16644	0.0991226
1242.11	0.172388	0.0962163
1244.95	0.175284	0.0989673
1247.78	0.200584	0.105524
1250.62	0.20958	0.11485
1253.46	0.225035	0.127035
1256.29	0.230253	0.140692
1259.13	0.235766	0.154953
1261.96	0.242541	0.169538
1264.79	0.242464	0.184237
1267.62	0.240532	0.198045
1270.44	0.232664	0.209117
1273.27	0.224349	0.216972
1276.09	0.21588	0.221684
1278.92	0.211484	0.22225
1281.74	0.207329	0.217768
1284.56	0.196138	0.208472
1287.38	0.170702	0.195263
1290.2	0.116778	0.178739
1293.01	0.0853948	0.159061
1295.83	0.0726116	0.137241
1298.64	0.0363857	0.11635
1301.45	0.0338565	0.0981005
1304.26	0.0373544	0.0824431
1307.07	0.0430266	0.0700598
1309.88	0.0575686	0.0613463
1312.69	0.081934	0.0553701
1315.49	0.0931748	0.0511897
1318.29	0.096052	0.0481561
1321.1	0.12063	0.0457641
1323.9	0.141894	0.0437403
1326.7	0.141589	0.0416676
1329.5	0.15157	0.039807
1332.29	0.144806	0.0380689
1335.09	0.14895	0.0358827
1337.88	0.151377	0.034246
1340.67	0.142876	0.0334341
1343.46	0.156618	0.0329883
1346.25	0.140779	0.0329007
1349.04	0.128735	0.0334145
1351.83	0.126156	0.0351823
1354.62	0.127208	0.0384728
1357.4	0.114957	0.0422931
1360.18	0.107329	0.0463751
1362.96	0.0989717	0.0506355
1365.74	0.0947931	0.0547876
1368.52	0.086876	0.0597526
1371.3	0.0893668	0.0652956
1374.08	0.095924	0.0716996
1376.85	0.0719079	0.081182
1379.62	0.0778832	0.0945066
1382.4	0.0937708	0.111292
1385.17	0.0917708	0.132764
1387.94	0.121972	0.160409
1390.7	0.169315	0.193467
1393.47	0.206661	0.230814
1396.24	0.259517	0.271342
1399	0.318828	0.31193
1401.76	0.385773	0.350071
1404.52	0.427944	0.383837
1407.28	0.45645	0.410304
1410.04	0.493464	0.427857
1412.8	0.499636	0.435574
1415.55	0.503724	0.433067
1418.31	0.478585	0.421402
1421.06	0.452796	0.402614
1423.81	0.420493	0.379454
1426.56	0.395594	0.354604
1429.31	0.355607	0.329871
1432.06	0.324045	0.306431
1434.8	0.300333	0.286117
1437.55	0.30062	0.270311
1440.29	0.285003	0.259693
1443.04	0.267587	0.253747
1445.78	0.273283	0.251808
1448.52	0.266534	0.253172
1451.25	0.285224	0.256972
1453.99	0.301933	0.262139
1456.73	0.283108	0.26725
1459.46	0.321719	0.271446
1462.19	0.328045	0.273515
1464.92	0.340128	0.272597
1467.65	0.346121	0.267902
1470.38	0.354959	0.258131
1473.11	0.339623	0.243625
1475.84	0.33877	0.2249
1478.56	0.324612	0.201931
1481.28	0.299261	0.176126
1484.01	0.287855	0.149221
1486.73	0.264303	0.12231
1489.45	0.236388	0.0961305
1492.16	0.199399	0.0722208
1494.88	0.189615	0.0521203
1497.6	0.160589	0.0366216
1500.31	0.141673	0.0253164
1503.02	0.134979	0.0184919
1505.73	0.143042	0.0174226
1508.44	0.129654	0.0215749
1511.15	0.127923	0.0308859
1513.86	0.106707	0.0461473
1516.57	0.122354	0.0664893
1519.27	0.132316	0.091761
1521.98	0.153852	0.122797
1524.68	0.145929	0.158414
1527.38	0.187066	0.196843
1530.08	0.20586	0.235834
1532.78	0.244519	0.273542
1535.47	0.283117	0.307128
1538.17	0.306185	0.33481
1540.86	0.331187	0.354787
1543.56	0.35849	0.365402
1546.25	0.356833	0.365903
1548.94	0.341593	0.356764
1551.63	0.34036	0.338823
1554.31	0.325145	0.314095
1557	0.288248	0.285231
1559.69	0.262721	0.25523
1562.37	0.245721	0.22607
1565.05	0.219523	0.199082
1567.73	0.22982	0.175763
1570.41	0.222295	0.157248
1573.09	0.221113	0.144177
1575.77	0.228979	0.137155
1578.45	0.231203	0.136392
1581.12	0.232753	0.140622
1583.8	0.237051	0.149106
1586.47	0.256949	0.160422
1589.14	0.270259	0.173537
1591.81	0.272908	0.188907
1594.48	0.280643	0.205954
1597.14	0.285417	0.223764
1599.81	0.289178	0.243224
1602.47	0.278916	0.264995
1605.14	0.282051	0.289841
1607.8	0.259023	0.31837
1610.46	0.281443	0.352144
1613.12	0.284266	0.39296
1615.78	0.318735	0.443083
1618.43	0.335982	0.503304
1621.09	0.388843	0.574121
1623.74	0.432202	0.653058
1626.4	0.514003	0.735726
1629.05	0.624178	0.815963
1631.7	0.739664	0.888507
1634.35	0.837597	0.946067
1636.99	0.901295	0.981851
1639.64	0.94112	0.992187
1642.29	0.927727	0.974573
1644.93	0.883736	0.929886
1647.57	0.805514	0.861157
1650.21	0.691777	0.773515
1652.85	0.586334	0.67453
1655.49	0.475174	0.569917
1658.13	0.386508	0.467184
1660.77	0.30358	0.37321
1663.4	0.250874	0.292015
1666.04	0.211115	0.224546
1668.67	0.17665	0.171868
1671.3	0.152801	0.132578
1673.93	0.150884	0.10399
1676.56	0.13709	0.0840748
1679.19	0.127443	0.0699672
1681.81	0.136088	0.0593568
1684.44	0.114542	0.0510588
1687.06	0.106349	0.0444828
1689.68	0.0871365	0.0392505
1692.3	0.0776452	0.0352083
1694.92	0.0775073	0.0316268
1697.54	0.0568931	0.0289547
1700.16	0.0410715	0.0272157
1702.78	0.0531726	0.0253005
1705.39	0.044005	0.0234138
1708	0.0424847	0.0220577
1710.62	0.0386258	0.0211852
1713.23	0.0299655	0.020736
1715.84	0.0336556	0.0203844
1718.45	0.0349337	0.0202408
1721.05	0.0353111	0.0198447
1723.66	0.047626	0.0194897
1726.26	0.0416759	0.0194382
1728.87	0.0678131	0.0194807
1731.47	0.0818633	0.0194795
1734.07	0.0963016	0.0194603
1736.67	0.102186	0.0203617
1739.27	0.102195	0.0208846
1741.87	0.115864	0.0208291
1744.46	0.122697	0.0209405
1747.06	0.131283	0.0213854
1749.65	0.148869	0.0223788
1752.24	0.149538	0.0229766
1754.84	0.139273	0.0235504
1757.43	0.140068	0.0243839
1760.01	0.157401	0.0249235
1762.6	0.155662	0.0253885
1765.19	0.149589	0.026225
1767.77	0.152007	0.0272465
1770.36	0.140794	0.0283427
1772.94	0.141669	0.0291321
1775.52	0.129451	0.0296211
1778.1	0.124904	0.0300798
1780.68	0.115914	0.030661
1783.26	0.120536	0.0317276
1785.83	0.103346	0.0321651
1788.41	0.100301	0.0321451
1790.98	0.0971591	0.0326934
1793.56	0.0810686	0.0335045
1796.13	0.0841083	0.0336579
1798.7	0.077138	0.0333131
1801.27	0.068498	0.0335622
1803.84	0.077703	0.0343244
1806.4	0.0850956	0.0344697
1808.97	0.0991195	0.0340123
1811.53	0.107859	0.0333413
1814.1	0.133368	0.0320653
1816.66	0.147155	0.0310119
1819.22	0.140101	0.0312196
1821.78	0.145115	0.0318804
1824.34	0.153816	0.0317095
1826.89	0.165133	0.031627
1829.45	0.188459	0.0316256
1832	0.215584	0.0314384
1834.56	0.228993	0.0315273
1837.11	0.238198	0.0309874
1839.66	0.258976	0.0303918
1842.21	0.251931	0.0303227
1844.76	0.259959	0.0302578
1847.3	0.253089	0.0302344
1849.85	0.25436	0.0302332
1852.4	0.262891	0.0301507
1854.94	0.269467	0.029914
1857.48	0.268451	0.0298422
1860.02	0.275775	0.0295783
1862.56	0.273177	0.0289319
1865.1	0.262222	0.0281806
1867.64	0.260341	0.0276503
1870.18	0.258182	0.0273524
1872.71	0.252597	0.0269055
1875.25	0.257736	0.0267651
1877.78	0.243012	0.0263413
1880.31	0.245292	0.0256309
1882.84	0.256814	0.0250251
1885.37	0.247208	0.0243944
1887.9	0.262622	0.0239019
1890.42	0.26525	0.0237049
1892.95	0.266226	0.0233419
1895.47	0.260577	0.023211
1898	0.265582	0.0235613
1900.52	0.275281	0.0237239
1903.04	0.281299	0.0237405
1905.56	0.282616	0.0237454
1908.08	0.300476	0.0232393
1910.6	0.315554	0.0227054
1913.11	0.316202	0.022122
1915.63	0.322222	0.0215625
1918.14	0.328111	0.0211325
1920.66	0.327701	0.0204742
1923.17	0.335496	0.0203581
1925.68	0.320525	0.0207122
1928.19	0.314843	0.0212272
1930.69	0.301349	0.0216456
1933.2	0.305747	0.0217923
1935.71	0.309476	0.0221044
1938.21	0.302545	0.0223945
1940.71	0.287447	0.0220735
1943.22	0.260503	0.0216093
1945.72	0.248633	0.021544
1948.22	0.239866	0.0224408
1950.72	0.239557	0.0232411
1953.21	0.230226	0.0234147
1955.71	0.226588	0.0239725
1958.2	0.224748	0.0248721
1960.7	0.213653	0.0259865
1963.19	0.191301	0.0267546
1965.68	0.201241	0.0274745
1968.17	0.197082	0.0287352
1970.66	0.184307	0.0299387
1973.15	0.177882	0.030917
1975.64	0.180025	0.0317453
1978.12	0.195761	0.0318767
1980.61	0.199003	0.0320448
1983.09	0.203288	0.0328767
1985.57	0.214838	0.0332685
1988.05	0.22592	0.0330718
1990.53	0.234486	0.0325475
1993.01	0.234321	0.0319851
1995.49	0.227824	0.03155
1997.97	0.235876	0.0304723
2000.44	0.235296	0.029388
2002.92	0.217945	0.0288851
2005.39	0.221819	0.0282387
2007.86	0.230609	0.0274996
2010.33	0.226481	0.0265728
2012.8	0.22356	0.0251342
2015.27	0.210786	0.0234565
2017.74	0.214981	0.0219951
2020.2	0.237423	0.0208386
2022.67	0.216359	0.0200082
2025.13	0.199915	0.0196424
2027.59	0.211199	0.0194056
2030.06	0.209191	0.0191043
2032.52	0.195832	0.018824
2034.98	0.170576	0.0189625
2037.43	0.15174	0.0194632
2039.89	0.128316	0.0197133
2042.35	0.0756684	0.0195608
2044.8	0.0182915	0.0190716
2047.26	0.0132991	0.0188116
2049.71	0.0713963	0.018777
2052.16	0.110196	0.0188958
2054.61	0.103036	0.0186947
2057.06	0.0589821	0.0182235
2059.51	0.0418533	0.0181729
2061.95	0.0397349	0.0180402
2064.4	0.0725811	0.0182037
2066.84	0.10942	0.0183799
2069.29	0.108321	0.0181204
2071.73	0.0997994	0.0178318
2074.17	0.0751659	0.0175528
2076.61	0.0676387	0.0176282
2079.05	0.0858385	0.0177546
2081.48	0.106769	0.0178029
2083.92	0.107914	0.0178904
2086.36	0.107396	0.017537
2088.79	0.111237	0.0171735
2091.22	0.144829	0.0172942
2093.66	0.168415	0.0170215
2096.09	0.188428	0.0163476
2098.52	0.214468	0.0164783
2100.95	0.235338	0.0170014
2103.37	0.248195	0.0176362
2105.8	0.243464	0.0178541
2108.22	0.226983	0.0175525
2110.65	0.244697	0.0175621
2113.07	0.242019	0.0180026
2115.49	0.243317	0.0183894
2117.91	0.230195	0.0183982
2120.33	0.212712	0.0186643
2122.75	0.20272	0.0195463
2125.17	0.191619	0.0199728
2127.59	0.195665	0.0193837
2130	0.186736	0.0191585
2132.42	0.178993	0.0194474
2134.83	0.180915	0.0196173
2137.24	0.127331	0.019781
2139.65	0.0669888	0.0195853
2142.06	0.0413161	0.0197185
2144.47	0.0701642	0.0202058
2146.88	0.094277	0.020744
2149.28	0.108779	0.0215327
2151.69	0.0819534	0.021512
2154.09	0.0430034	0.0210868
2156.5	0.0139804	0.0210843
2158.9	0.0331838	0.0212246
2161.3	0.0754565	0.0209022
2163.7	0.104707	0.0199589
2166.1	0.123725	0.0188743
2168.49	0.124222	0.0184771
2170.89	0.101098	0.0184758
2173.29	0.0841824	0.0183125
2175.68	0.0785946	0.0184442
2178.07	0.0696873	0.0187139
2180.46	0.1053	0.0186146
2182.86	0.126973	0.0182248
2185.25	0.137085	0.0180368
2187.63	0.142747	0.0180605
2190.02	0.156348	0.0178712
2192.41	0.146946	0.0177622
2194.79	0.145009	0.0180029
2197.18	0.125269	0.0179776
2199.56	0.0984051	0.017668
2201.94	0.0867328	0.0178494
2204.32	0.108691	0.0183231
2206.7	0.124381	0.0183551
2209.08	0.138201	0.0183214
2211.46	0.121709	0.0185656
2213.84	0.100219	0.0186674
2216.21	0.0771326	0.0183493
2218.59	0.065129	0.01788
2220.96	0.0530642	0.0179904
2223.33	0.0479107	0.0182541
2225.7	0.0610106	0.018209
2228.08	0.0814075	0.0178007
2230.44	0.0957426	0.0170796
2232.81	0.0982284	0.0167363
2235.18	0.0823936	0.0169925
2237.54	0.0647088	0.0174442
2239.91	0.0498922	0.0172688
2242.27	0.0303521	0.0168965
2244.64	0.022047	0.0174012
2247	0.0196169	0.0180304
2249.36	0.0241688	0.017938
2251.72	0.0405476	0.0178737
2254.08	0.060716	0.0179805
2256.43	0.0654463	0.0179151
2258.79	0.0670912	0.0180553
2261.14	0.0705618	0.0184392
2263.5	0.0855099	0.0184497
2265.85	0.0851095	0.0181039
2268.2	0.0721796	0.0181603
2270.55	0.0650473	0.0181783
2272.9	0.0843266	0.0179339
2275.25	0.0924516	0.0180164
2277.6	0.0939026	0.0179797
2279.95	0.0934737	0.0175836
2282.29	0.0968919	0.0172001
2284.64	0.092226	0.0168155
2286.98	0.109359	0.0165418
2289.32	0.106505	0.0164692
2291.66	0.10218	0.0161156
2294	0.0929785	0.0158289
2296.34	0.0933051	0.0159411
2298.68	0.0947702	0.015726
2301.02	0.11449	0.015326
2303.35	0.107826	0.015259
2305.69	0.109681	0.015326
2308.02	0.0965169	0.0153851
2310.35	0.0842496	0.0154544
2312.69	0.0692712	0.0154101
2315.02	0.0815237	0.0152369
2317.35	0.0700446	0.0150258
2319.67	0.0618105	0.0147315
2322	0.0504029	0.0146291
2324.33	0.052742	0.0148868
2326.65	0.0559867	0.0151706
2328.98	0.0573299	0.0152033
2331.3	0.0482404	0.0152415
2333.62	0.0547557	0.0153087
2335.94	0.0428431	0.0152409
2338.26	0.0489974	0.015406
2340.58	0.0431895	0.0154293
2342.9	0.0491833	0.0151115
2345.22	0.0545612	0.0149265
2347.53	0.0482293	0.0150527
2349.85	0.0507304	0.0151867
2352.16	0.0510819	0.0151759
2354.48	0.0504922	0.0153267
2356.79	0.0547565	0.0153881
2359.1	0.0650198	0.0153476
2361.41	0.0733576	0.0153291
2363.72	0.0738766	0.0151725
2366.02	0.0778972	0.0151046
2368.33	0.0714845	0.0149834
2370.64	0.0724647	0.0148302
2372.94	0.0725079	0.0147395
2375.24	0.0689998	0.0144509
2377.55	0.0775416	0.0144304
2379.85	0.0728185	0.0147395
2382.15	0.0743708	0.0149934
2384.45	0.0892906	0.0153619
2386.75	0.0840686	0.0158243
2389.04	0.0793526	0.0162282
2391.34	0.0830987	0.0165445
2393.63	0.0828059	0.01657
2395.93	0.0759651	0.0162437
2398.22	0.0664854	0.0159323
2400.51	0.0677076	0.0156137
2402.8	0.0723671	0.0153188
2405.09	0.0681985	0.0153035
2407.38	0.066223	0.0152645
2409.67	0.0657596	0.0150127
2411.96	0.0587669	0.0146157
2414.24	0.0573972	0.0142136
2416.53	0.0573373	0.013913
2418.81	0.049232	0.0138452
2421.09	0.0467219	0.0141221
2423.38	0.0500284	0.0141717
2425.66	0.0519589	0.0139479
2427.94	0.0504072	0.0138361
2430.22	0.0535216	0.0137785
2432.49	0.0540028	0.0137308
2434.77	0.0582978	0.0135482
2437.05	0.0524973	0.013081
2439.32	0.0545659	0.0125171
2441.59	0.0591902	0.0122757
2443.87	0.0693007	0.0123037
2446.14	0.0688185	0.0120407
2448.41	0.0773237	0.0115466
2450.68	0.0746127	0.0114501
2452.95	0.0787958	0.0115491
2455.21	0.0771463	0.0112538
2457.48	0.078796	0.0108699
2459.75	0.0883628	0.0107217
2462.01	0.0940335	0.0104033
2464.27	0.0990818	0.00999802
2466.54	0.102681	0.00986023
2468.8	0.095907	0.00952765
2471.06	0.104456	0.0090403
2473.32	0.104393	0.00896692
2475.58	0.109139	0.00849233
2477.83	0.106161	0.00800111
2480.09	0.103392	0.0079928
2482.34	0.101425	0.0075863
2484.6	0.10716	0.00684689
2486.85	0.101165	0.00629807
2489.1	0.0997517	0.00586075
2491.36	0.105203	0.00520203
2493.61	0.104868	0.00428621
2495.86	0.103508	0.00346919
2498.1	0.101086	0.00273543
2500.35	0.0996647	0.00164045
2502.6	0.0995497	-0.00026546
2504.84	0.0985557	-0.00341758
2507.09	0.0952527	-0.00829524
2509.33	0.101379	-0.0153036
2511.57	0.105294	-0.024907
